# Supplementary material
Source: publisher site journal article supplement (https://www.dovepress.com/article/319675)
Supplement: Supplementary file 1 [file get_supplementary_file.php]

**Supplemental Figure A.**


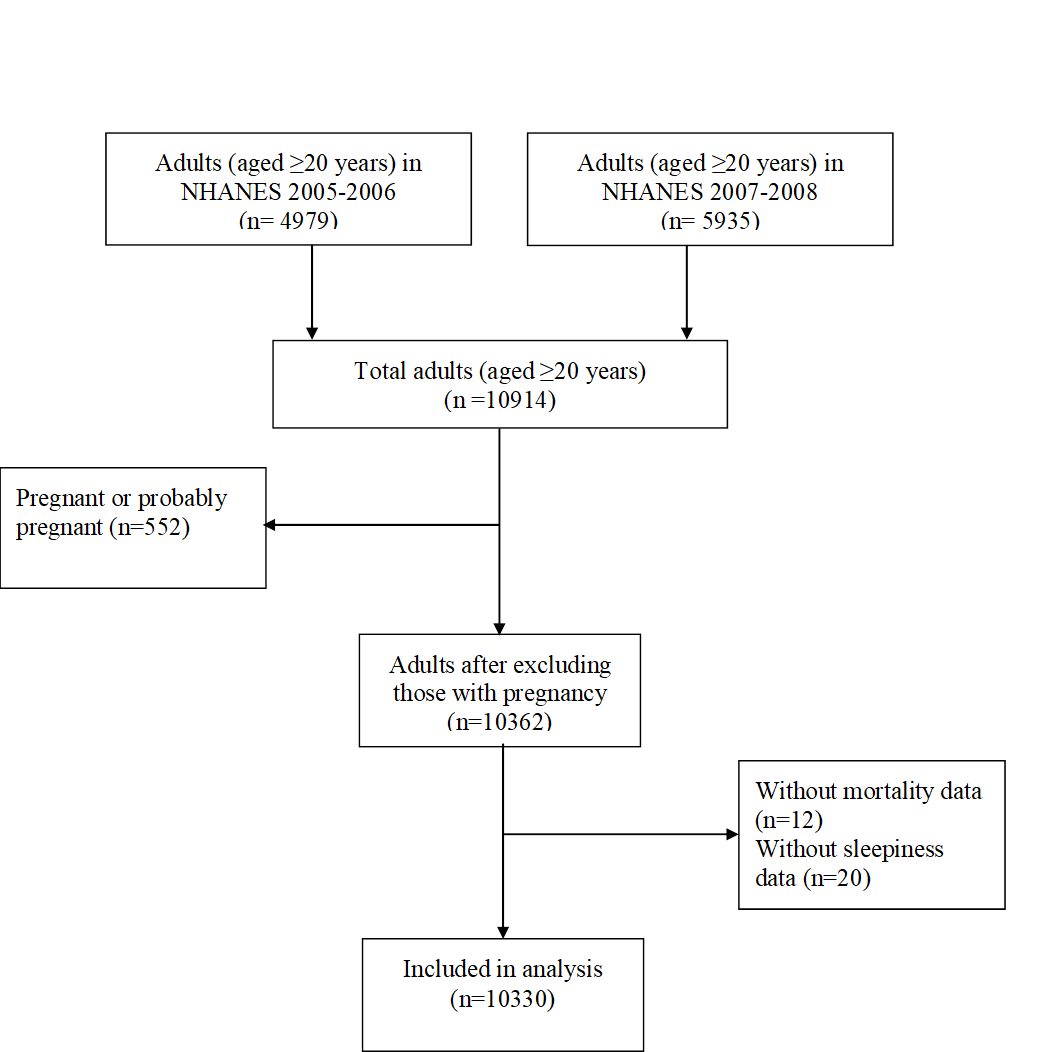


Figure A. Study flow chart. NHANES, the US National Health and Nutrition Examination Survey.
